# Supplementary material for: Tissue‐resident macrophages actively suppress IL‐1beta release via a reactive prostanoid/IL‐10 pathway
Source: PubMed Central journal article supplement (PMC7360975; doi:10.15252/embj.2019103454), 2020-06-02
Supplement: EMBJ-39-e103454-s001.pdf [file EMBJ-39-e103454-s001.pdf]

## Expanded View Figures

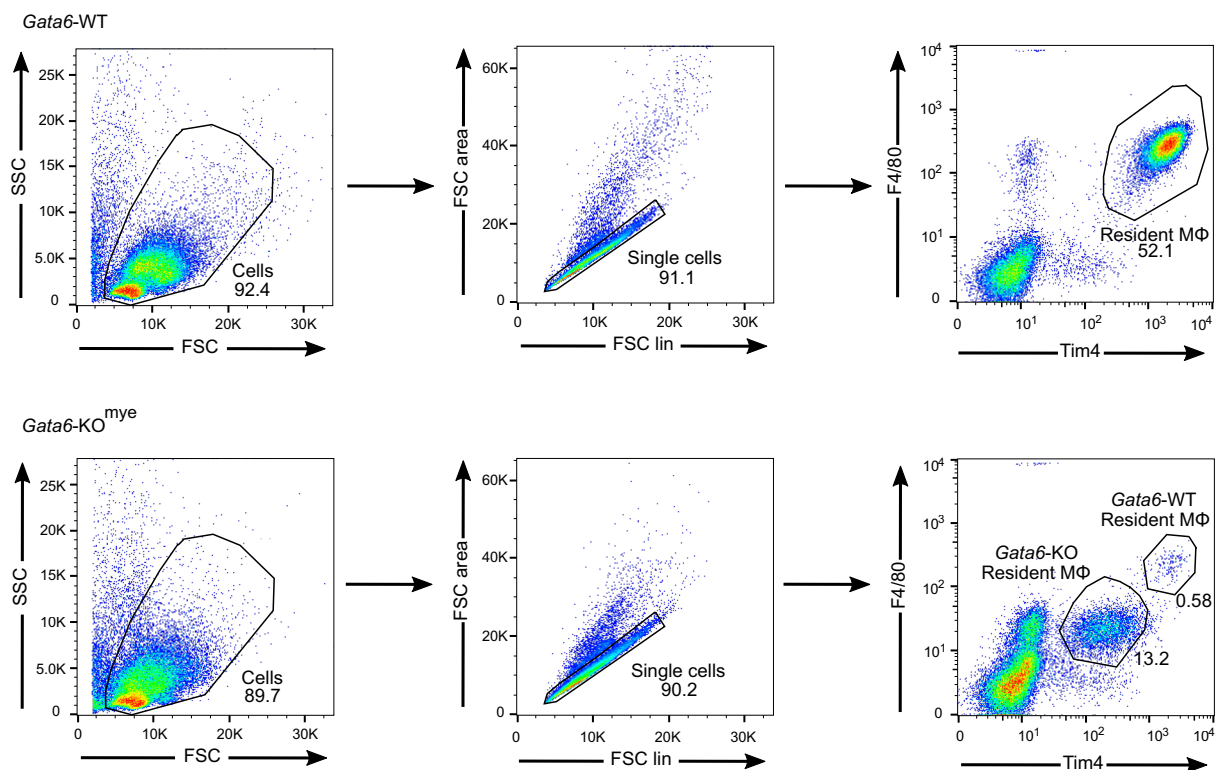

**Figure EV1. Representative gating strategy of pMΦ from Gata6-WT and Gata6-KO<sup>mye</sup> mice.**

First, dead cells are excluded based on FSC and SSC value; then, single cells are gated based on FCS area and FCS linear value. pMΦ are then identified as F4/80<sup>hi</sup>Tim4<sup>+</sup> (Gata6-WT) or F4/80<sup>hi</sup>Tim4<sup>+</sup> (Gata6-KO<sup>mye</sup>).

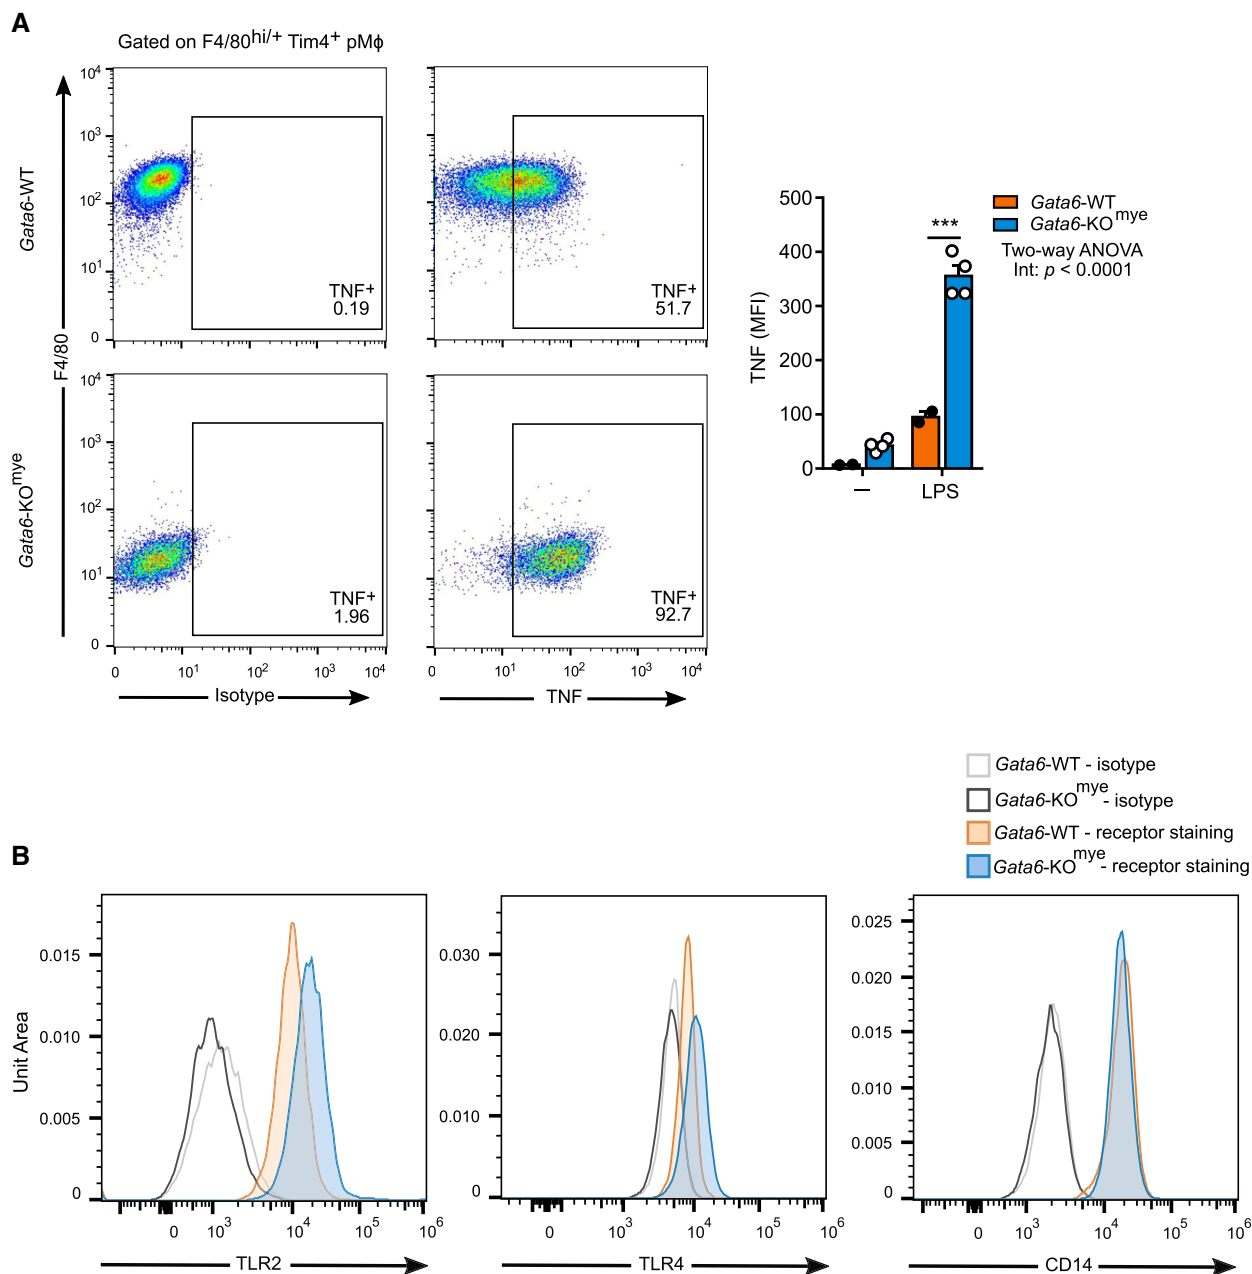

**Figure EV2. Flow cytometry analysis of intracellular TNF and extracellular TLR2, TLR4 and CD14 expression.**

A Representative flow cytometry analysis of TNF expression in *Gata6*-WT and *Gata6*-KO<sup>mye</sup> pMΦ stimulated for 3 h with 100 ng/ml LPS and 0.1 % (v/v) GolgiBlock. Data shown are representative of at least three independent experiments. Data are expressed as mean ± SEM. Two-way ANOVA analysis followed by Tukey's multiple comparison post-test was performed. \*\*\* $P < 0.001$ .

B Histogram overlays of flow cytometry analysis of cell surface expression of TLR2, TLR4 and CD14 of *Gata6*-WT and *Gata6*-KO<sup>mye</sup> pMΦ.

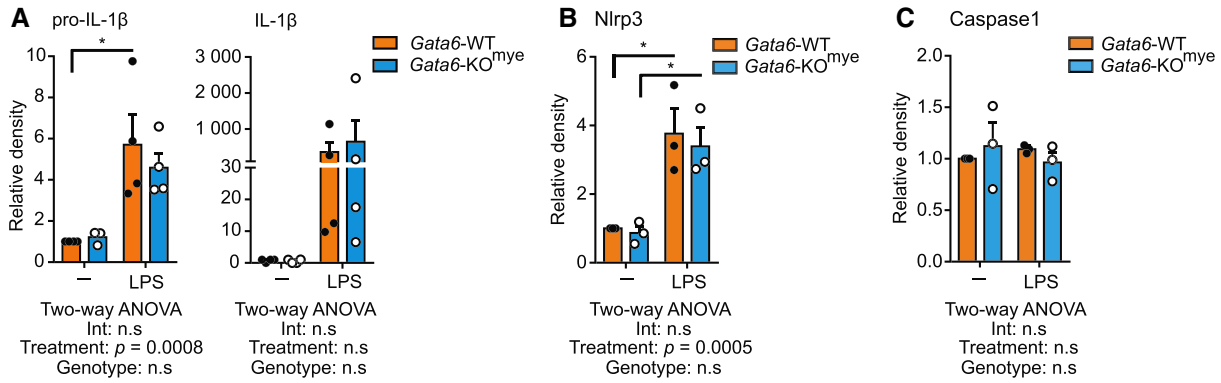

**Figure EV3. Western blot quantification of the immature and mature IL-1 $\beta$  and the canonical inflammasome machinery.**

Western blot quantification of pro-IL-1 $\beta$  and mature IL-1 $\beta$  (A), Nlrp3 (B) and caspase1 (C) of Gata6-WT and Gata6-KO<sup>mye</sup> pM $\Phi$ , unstimulated or stimulated overnight with 100 ng/ml LPS. Results showed are pooled from three independent experiments, normalized to Gata6-WT unstimulated sample and are expressed as mean  $\pm$  SEM. Two-way ANOVA analysis followed by Tukey's multiple comparison post-test was performed. \* $P < 0.05$ .

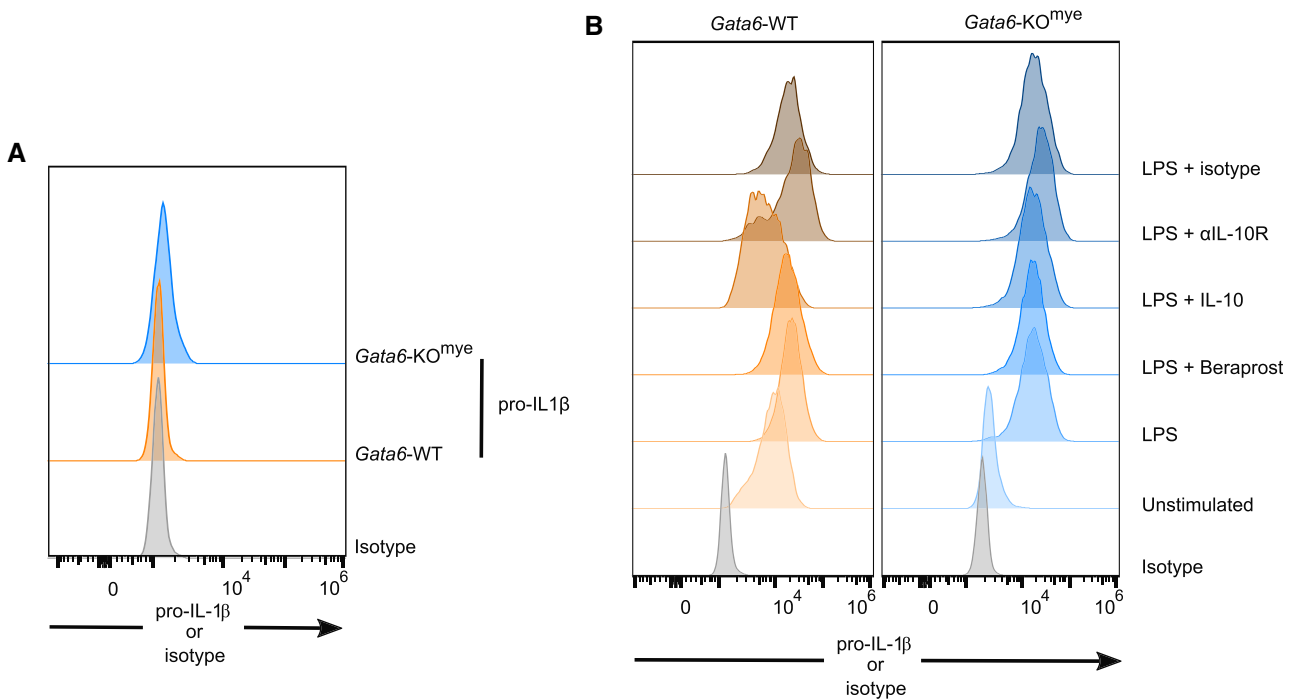

**Figure EV4. Flow cytometry analysis of intracellular pro-IL-1 $\beta$ .**

Flow cytometry analysis of intracellular pro-IL-1 $\beta$  content in Gata6-WT and Gata6-KO<sup>mye</sup> pM $\Phi$  freshly isolated (A) or after 16 h incubation unstimulated or stimulated with 100 ng/ml ultrapure LPS, 10  $\mu$ M beraprost, 10 ng/ml IL-10, 5  $\mu$ g/ml  $\alpha$ IL-10R or 5  $\mu$ g/ml isotype (B). Data shown are representative of  $n = 6-13$  individual mice.

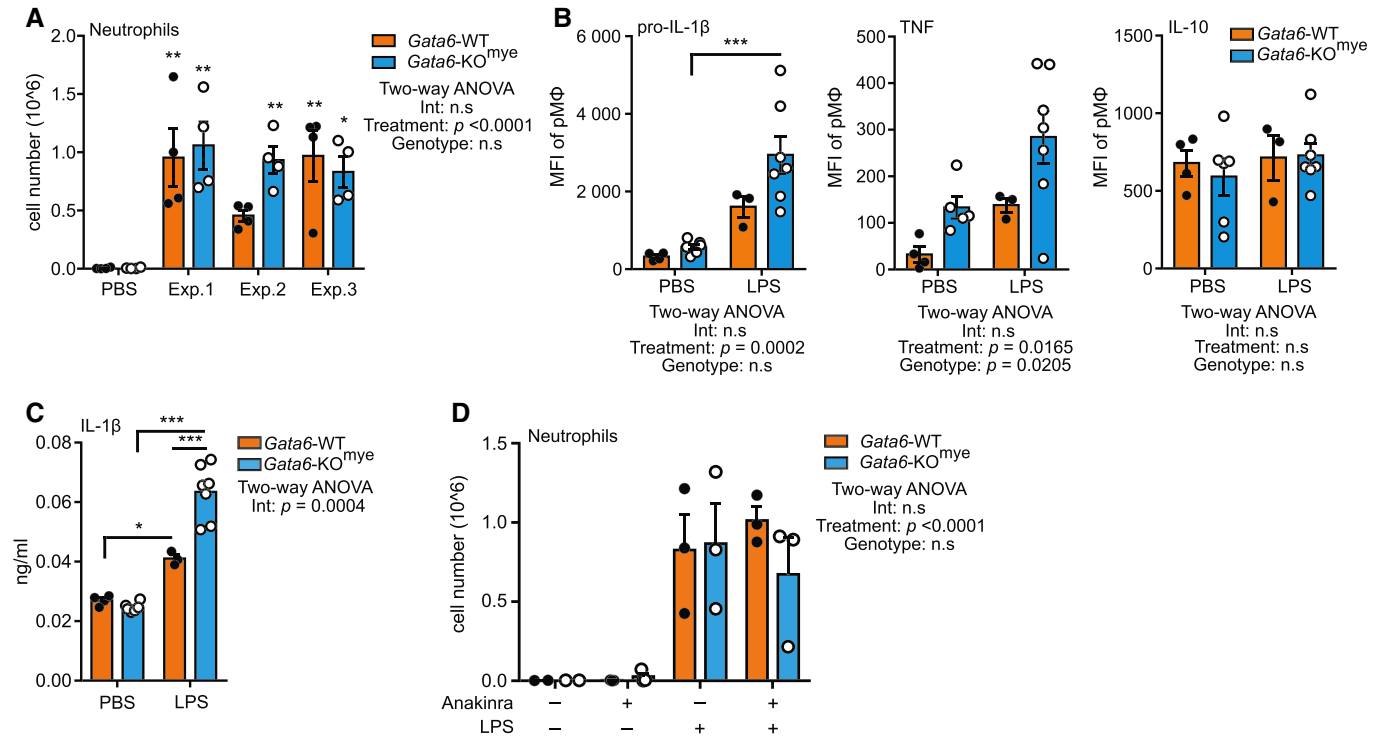

**Figure EV5. Flow cytometry analysis of LPS-induced peritonitis in *Gata6*-WT and *Gata6*-KO<sup>mye</sup> mice.**

- A Flow cytometry analysis of neutrophil (Ly6G<sup>+</sup> CD11b<sup>+</sup>) number recruited to the peritoneal cavity of *Gata6*-WT and *Gata6*-KO<sup>mye</sup> mice 4 h after i.p injection of 1 ng ultra-pure LPS. Three independent experiments are shown,  $n = 4$  mice per group. Significance are indicated by \* over the bar, compared to the corresponding control (*Gata6*-WT or *Gata6*-KO<sup>mye</sup> PBS injected).
- B Flow cytometry analysis of intracellular cytokines in *Gata6*-WT and *Gata6*-KO<sup>mye</sup> pM $\Phi$ , 3 h after i.p injection of PBS or 1 ng ultra-pure LPS.
- C ELISA analysis of IL-1 $\beta$  contained in the peritoneal fluid of *Gata6*-WT and *Gata6*-KO<sup>mye</sup> mice, 3 h after i.p injection of PBS or 1 ng ultra-pure LPS.  $n = 3-6$  mice per group.
- D Flow cytometry analysis of neutrophil (Ly6G<sup>+</sup> CD11b<sup>+</sup>) number recruited to the peritoneal cavity of *Gata6*-WT and *Gata6*-KO<sup>mye</sup> mice 4 h after i.p injection of 1 ng ultra-pure LPS combined or not with 50 mg/ml Anakinra,  $n = 2-3$  mice per group. Results are expressed as mean  $\pm$  SEM. Two-way ANOVA analysis followed by Tukey's multiple comparison post-test was performed. \* $P < 0.05$ , \*\* $P < 0.01$ , \*\*\* $P < 0.001$ .
